# Supplementary material for: Breast cancer risk in papilloma patients: Osteopontin splice variants indicate prognosis
Source: Springer Nature journal article supplement (doi:10.1186/s13058-022-01561-9), 2022-09-29

**Table S1: Relative risk based on pathology scores.** The relative risk for progression was calculated for the ipsilateral (upper block) or contralateral (lower block) breast. + behind a score indicates all scores equal to and higher than the given number lumped together. CI(95%) = 95% confidence interval, Fisher indicates Fisher's exact test,  $\chi^2$  =  $\chi^2$ -test. Numbers in parentheses indicate the risk for the higher pathology score alone (relative risk could not be calculated because of a division by 0 error).

Table S1

**ipsilateral  
OPNc**

|            | comparison | Relative |          | p-value | p-value |
|------------|------------|----------|----------|---------|---------|
|            |            | Risk     | CI (95%) |         |         |
| intensity  | 1+ vs 0    | (0.133)  |          | 0.211   | 0.100   |
|            | 2+ vs 1    | 2.870    | 0.831    | 9.912   | 0.075   |
|            | 3 vs 2     | 0.450    | 0.064    | 3.186   | 0.075   |
| positivity | 1+ vs 0    | (0.133)  |          | 0.211   | 0.100   |
|            | 2+ vs 1    | 2.200    | 0.307    | 15.785  | 0.405   |
|            | 3 vs 2     | 1.108    | 0.370    | 3.318   | 1.000   |
| additive   | 1+ vs 0    | (0.133)  |          | 0.211   | 0.100   |
|            | 2+ vs 1    |          |          |         |         |
|            | 3+ vs 2    | 1.692    | 0.237    | 11.952  | 1.000   |
|            | 4+ vs 3    | 2.000    | 0.467    | 8.567   | 0.487   |
|            | 5+ vs 4    | 1.724    | 0.480    | 6.192   | 0.480   |
|            | 6 vs 5     | 0.444    | 0.060    | 3.277   | 0.633   |

**OPN ex4**

|            | comparison | Relative |          | p-value | p-value |
|------------|------------|----------|----------|---------|---------|
|            |            | Risk     | CI (95%) |         |         |
| intensity  | 1+ vs 0    | 0.805    | 0.261    | 2.481   | 0.740   |
|            | 2+ vs 1    | 2.222    | 0.571    | 8.644   | 0.277   |
|            | 3 vs 2     | 1.813    | 0.264    | 12.436  | 0.500   |
| positivity | 1+ vs 0    | 0.805    | 0.261    | 2.481   | 0.740   |
|            | 2+ vs 1    | 0.801    | 0.208    | 3.089   | 0.710   |
|            | 3 vs 2     | 8.235    | 0.995    | 68.152  | 0.034   |
| additive   | 1+ vs 0    | 0.081    | 0.261    | 2.481   | 0.740   |
|            | 2+ vs 1    |          |          |         |         |
|            | 3+ vs 2    | 0.983    | 0.216    | 4.467   | 1.000   |
|            | 4+ vs 3    | 3.286    | 0.410    | 26.342  | 0.386   |
|            | 5+ vs 4    | 3.273    | 0.634    | 16.883  | 0.297   |
|            | 6 vs 5     | 2.250    | 0.355    | 14.279  | 0.491   |

**combined**

|            | comparison | Relative |          | p-value | p-value |
|------------|------------|----------|----------|---------|---------|
|            |            | Risk     | CI (95%) |         |         |
| intensity  | 0 vs 1+    | (0.118)  |          | 1.000   | 0.373   |
|            | 1 vs 2+    | (0.146)  |          | 0.117   | 0.069   |
|            | 2 vs 3+    | 1.417    | 0.464    | 4.329   | 0.753   |
|            | 3 vs 4+    | 1.087    | 0.307    | 3.851   | 1.000   |
|            | 4 vs 5+    | 0.000    |          | 1.000   | 0.394   |
| positivity | 0 vs 1+    | (0.118)  |          | 1.000   | 0.373   |
|            | 1 vs 2+    | (0.130)  |          | 0.602   | 0.224   |
|            | 2 vs 3+    | 1.765    | 0.416    | 7.486   | 0.725   |
|            | 3 vs 4+    | 0.500    | 0.160    | 1.563   | 0.254   |
|            | 4 vs 5+    | 1.517    | 0.341    | 7.548   | 0.688   |
|            | 5 vs 6     | 2.625    | 0.441    | 15.609  | 0.300   |

**contralateral  
OPNc**

|            | comparison | Relative |          | p-value | p-value |
|------------|------------|----------|----------|---------|---------|
|            |            | Risk     | CI (95%) |         |         |
| intensity  | 1+ vs 0    | (0.071)  |          | 0.587   | 0.242   |
|            | 2+ vs 1    | 5.000    | 0.610    | 40.995  | 0.202   |
|            | 3 vs 2     | 3.750    | 0.714    | 19.707  | 0.131   |
| positivity | 1+ vs 0    | (0.071)  |          | 0.587   | 0.242   |
|            | 2+ vs 1    | 0.471    | 0.094    | 2.349   | 0.320   |
|            | 3 vs 2     | 2.667    | 0.292    | 24.370  | 0.616   |
| additive   | 1+ vs 0    | (0.071)  |          | 0.587   | 0.242   |
|            | 2+ vs 1    |          |          |         |         |
|            | 3+ vs 2    | 0.833    | 0.106    | 6.527   | 1.000   |
|            | 4+ vs 3    | 1.878    | 0.222    | 15.872  | 1.000   |
|            | 5+ vs 4    | (0.148)  |          | 0.117   | 0.060   |
|            | 6 vs 5     | 1.700    | 0.282    | 10.260  | 0.613   |

**OPN ex4**

|            | comparison | Relative |          | p-value | p-value |
|------------|------------|----------|----------|---------|---------|
|            |            | Risk     | CI (95%) |         |         |
| intensity  | 1+ vs 0    | (0.08)   |          | 0.337   | 0.130   |
|            | 2+ vs 1    | 0.750    | 0.146    | 3.841   | 1.000   |
|            | 3 vs 2     | 0.000    | 0.000    | 0.000   | 1.000   |
| positivity | 1+ vs 0    | (0.080)  |          | 0.740   | 0.707   |
|            | 2+ vs 1    | 2.212    | 0.273    | 17.883  | 0.660   |
|            | 3 vs 2     | 3.375    | 0.623    | 18.282  | 0.163   |
| additive   | 1+ vs 0    | (0.08)   |          | 0.337   | 0.130   |
|            | 2+ vs 1    |          |          |         |         |
|            | 3+ vs 2    | 1.579    | 0.197    | 12.646  | 1.000   |
|            | 4+ vs 3    | 2.706    | 0.323    | 22.689  | 0.638   |
|            | 5+ vs 4    | 0.926    | 0.110    | 7.800   | 1.000   |
|            | 6 vs 5     | 0.000    | 0.000    | 0.000   | 1.000   |

**combined**

|            | comparison | Relative |          | p-value | p-value |
|------------|------------|----------|----------|---------|---------|
|            |            | Risk     | CI (95%) |         |         |
| intensity  | 0 vs 1+    | (0.063)  |          | 1.000   | 0.528   |
|            | 1 vs 2+    | (0.079)  |          | 0.338   | 0.194   |
|            | 2 vs 3+    | 3.444    | 0.423    | 28.064  | 0.391   |
|            | 3 vs 4+    | 3.826    | 0.463    | 31.619  | 0.346   |
|            | 4 vs 5+    | 1.583    | 0.216    | 11.581  | 1.000   |
| positivity | 0 vs 1+    | (0.063)  |          | 1.000   | 0.528   |
|            | 1 vs 2+    | (0.070)  |          | 1.000   | 0.388   |
|            | 2 vs 3+    | (0.094)  |          | 0.331   | 0.136   |
|            | 3 vs 4+    | (0.118)  |          | 0.333   | 0.194   |
|            | 4 vs 5+    | 0.444    | 0.089    | 2.214   | 0.402   |
|            | 5 vs 6     | 2.857    | 0.205    | 39.829  | 0.459   |

**Figure S1: Breast cancer risk scores.** Comparison among three different cut-offs for hOPN-c intensity scores to dichotomize low versus high. The left panel shows the chosen separation of 0,1 = low and 2,3 = high, the middle panel displays 0 = low and 1-3 = high, the right panel has 0-2 = low and 3 = high.

hOPNc 0-1/2-3

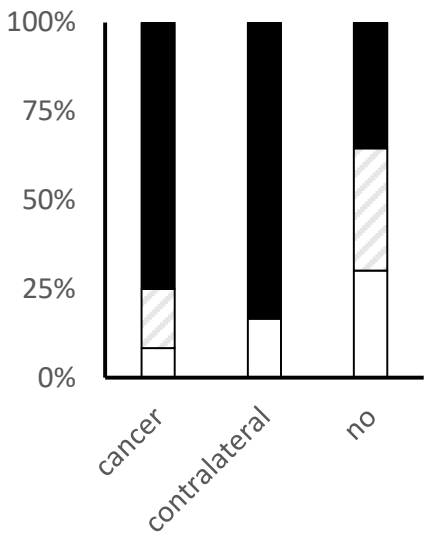

hOPNc 0/1-3

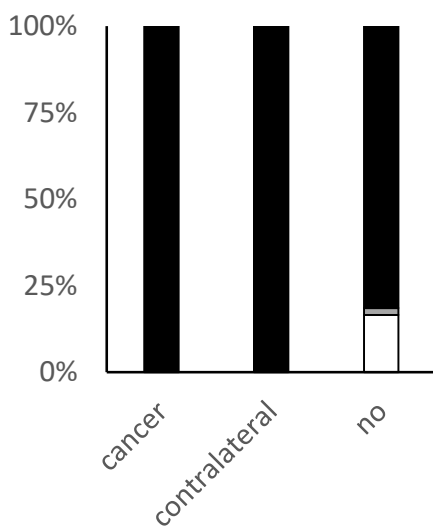

hOPNc 0-2/3

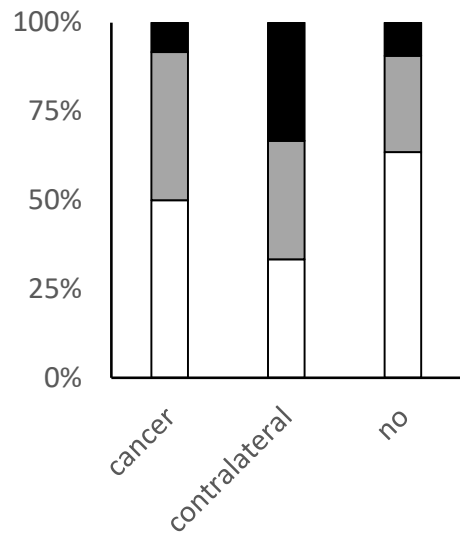

Supplement: MOESM1 [file 23553662]
